# Supplementary material for: Influence of pharmacist intervention on drug safety of geriatric inpatients: a prospective, controlled trial
Source: PubMed Central journal article supplement — Ther Adv Drug Saf. 2019 Apr 16;10:2042098619843365. doi: 10.1177/2042098619843365 (PMC6469284; doi:10.1177/2042098619843365), 2019-04-16
Supplement: Online_figure_5.pdf [file Online_figure_5.pdf]

|                         |                                          |                                                                                                                                                                                                                                                                                                                                                                                                                                                                                   |
|-------------------------|------------------------------------------|-----------------------------------------------------------------------------------------------------------------------------------------------------------------------------------------------------------------------------------------------------------------------------------------------------------------------------------------------------------------------------------------------------------------------------------------------------------------------------------|
| Drug:                   | <input type="text" value="Tolterodine"/> | explanation of the recommendation:                                                                                                                                                                                                                                                                                                                                                                                                                                                |
| priority:               | <input type="text" value="high"/>        | <p>Tolterodine – not modified-release dosage - is a PRISCUS-PIM = potentially inappropriate medication for older people. It has anticholinergic side effects (ADR) like cognitive impairment, xerostomia=dryness of the mouth, CNS-side effects.</p> <p>Please stop this drug and check if a non-medical treatment is possible. A medical alternative treatment could be Trospium chloride. Spasmex® is stocked and available in our hospital, possible dosage: 15mg 2-0-1-0.</p> |
| problem:                | <input type="text" value="PRISCUS-PIM"/> |                                                                                                                                                                                                                                                                                                                                                                                                                                                                                   |
| type of recommendation: | <input type="text" value="stop drug"/>   |                                                                                                                                                                                                                                                                                                                                                                                                                                                                                   |
|                         |                                          | acceptance:                                                                                                                                                                                                                                                                                                                                                                                                                                                                       |
|                         |                                          | <input type="text" value="accepted"/>                                                                                                                                                                                                                                                                                                                                                                                                                                             |

**Online figure 1 – pharmaceutical recommendation - example**
