# Supplementary material for: Influence of pharmacist intervention on drug safety of geriatric inpatients: a prospective, controlled trial
Source: PubMed Central journal article supplement — Ther Adv Drug Saf. 2019 Apr 16;10:2042098619843365. doi: 10.1177/2042098619843365 (PMC6469284; doi:10.1177/2042098619843365), 2019-04-16
Supplement: Online_tables(5-6).pdf [file Online_tables%285-6%29.pdf]

Online table 5: Drug-related problems in controls and intervention group (Matched Pairs-Population)

| outcome variable                              | Time      | Value | Intervention group<br>(n=188) |       | Control group<br>(n=188) |       | p-value<br>(McNemar) |
|-----------------------------------------------|-----------|-------|-------------------------------|-------|--------------------------|-------|----------------------|
|                                               |           |       | N                             | %*    | n                        | %*    |                      |
| PRISCUS-PIM<br>(≥1)                           | admission | no    | 124                           | 66.0% | 136                      | 72.3% | 0.14                 |
|                                               |           | yes   | 64                            | 34.0% | 52                       | 27.7% |                      |
|                                               | discharge | no    | 159                           | 84.6% | 142                      | 75.5% | 0.027                |
|                                               |           | yes   | 29                            | 15.4% | 46                       | 24.5% |                      |
| Drug prescribed<br>without indication<br>(≥1) | admission | no    | 41                            | 21.8% | 58                       | 30.9% | 0.059                |
|                                               |           | yes   | 147                           | 78.2% | 130                      | 69.2% |                      |
|                                               | discharge | no    | 119                           | 63.3% | 64                       | 34.0% | < 0.001              |
|                                               |           | yes   | 69                            | 36.7% | 124                      | 66.0% |                      |
|                                               | admission | no    | 154                           | 81.9% | 156                      | 83.0% |                      |

|                                        |           |     |     |       |     |       |         |
|----------------------------------------|-----------|-----|-----|-------|-----|-------|---------|
| adverse drug<br>reaction ( $\geq 1$ )  |           | yes | 34  | 18.1% | 32  | 17.0% | 0.796   |
|                                        | discharge | no  | 182 | 96.8% | 148 | 78.7% |         |
|                                        |           | yes | 6   | 3.2%  | 40  | 21.3% | < 0.001 |
| drug-drug-<br>interaction ( $\geq 1$ ) | admission | no  | 158 | 84.0% | 160 | 85.1% |         |
|                                        |           | yes | 30  | 16.0% | 28  | 14.9% | 0.773   |
|                                        | discharge | no  | 160 | 85.1% | 158 | 84.0% |         |
|                                        |           | yes | 28  | 14.9% | 30  | 16.0% | 0.763   |
| Primary outcome<br>variable:           | admission | no  | 25  | 13.3% | 44  | 23.4% |         |
|                                        |           | yes | 163 | 86.7% | 144 | 76.6% | 0.015   |
|                                        | discharge | no  | 88  | 46.8% | 44  | 23.4% |         |
|                                        |           | yes | 100 | 53.2% | 144 | 76.6% | < 0.001 |

\* The percentages refer to the number of non-missing values of the row variables within the groups and times (column sum per row variable = 100%).

**Online table 6: Detailed results of the medication appropriateness index**

|                                                                  | full analysis set          |             |                       |             |                                                                                                           |
|------------------------------------------------------------------|----------------------------|-------------|-----------------------|-------------|-----------------------------------------------------------------------------------------------------------|
| MAI-question<br>(average ±<br>standard deviation per<br>patient) | Intervention group (n=209) |             | Control group (n=202) |             | p-value<br><br>(comparison of the<br>values at discharge<br>between<br>intervention and<br>control group) |
|                                                                  | Admission                  | Discharge   | Admission             | Discharge   |                                                                                                           |
| 1. Indication                                                    | 3.47 ± 3.03                | 1.42 ± 2.24 | 3.16 ± 3.04           | 2.68 ± 2.69 | <0.001                                                                                                    |
| 2. Effectiveness                                                 | 5.22 ± 5.08                | 2.44 ± 3.29 | 4.50 ± 4.60           | 4.51 ± 4.87 | <0.001                                                                                                    |
| 3. Dosage                                                        | 12.14 ± 9.20               | 4.23 ± 5.07 | 7.92 ± 8.19           | 6.49 ± 6.61 | <0.001                                                                                                    |

|                             |               |               |               |               |        |
|-----------------------------|---------------|---------------|---------------|---------------|--------|
| 4. Correct directions       | 4.86 ± 4.17   | 1.76 ± 2.43   | 4.00 ± 3.42   | 3.88 ± 3.47   | <0.001 |
| 5. Practical directions     | 1.47 ± 1.59   | 0.67 ± 1.14   | 1.37 ± 1.52   | 1.58 ± 1.70   | <0.001 |
| 6. Drug-drug interaction    | 14.68 ± 13.61 | 9.20 ± 9.53   | 12.79 ± 12.42 | 13.11 ± 12.89 | <0.001 |
| 7. Drug-disease interaction | 6.88 ± 6.90   | 2.45 ± 3.74   | 4.46 ± 6.27   | 5.06 ± 6.64   | <0.001 |
| 8. Duplication              | 3.09 ± 5.97   | 0.83 ± 2.60   | 1.74 ± 4.23   | 1.51 ± 3.72   | 0.066  |
| 9. Duration                 | 4.52 ± 4.02   | 1.90 ± 2.77   | 3.28 ± 3.55   | 4.28 ± 4.40   | <0.001 |
| Overall per patient         | 56.34 ± 33.84 | 24.92 ± 18.39 | 43.21 ± 29.25 | 43.13 ± 30.62 | <0.001 |
